# Supplementary material for: Structural coloration of textiles with PMMA photonic crystals
Source: Royal Society of Chemistry journal article supplement (doi:10.1039/d3tc02586a), 2023-11-11
Supplement: d3tc02586a1.pdf [file d3tc02586a1.pdf]

## Supporting Information

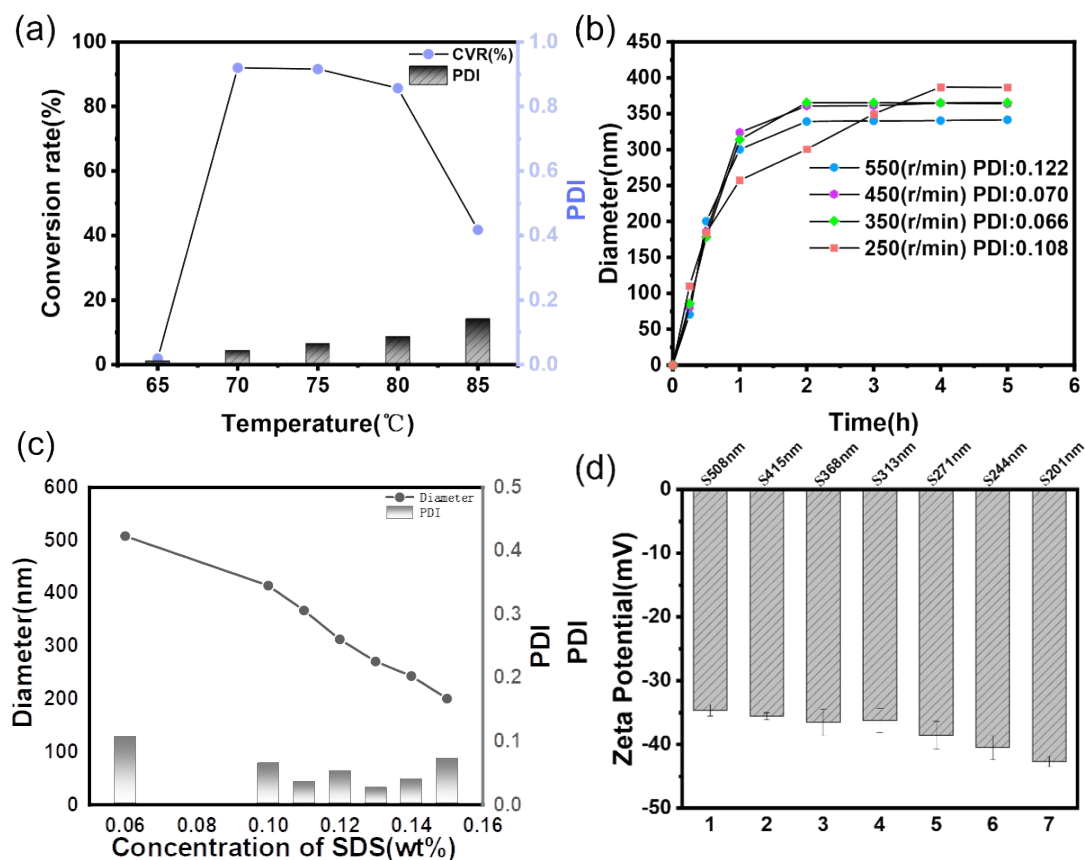

Figure S1 (a) Effect of temperature on conversion rate of MMA monomer and monodispersity of colloidal PMMA nanospheres; (b) Effect of stirring rate on particle size and monodispersity of colloidal PMMA nanospheres; (c) Effect of emulsifier (SDS) dosage on particle size and monodispersity of colloidal PMMA nanospheres; (d) Zeta potential of colloidal PMMA nanospheres with various particle sizes.

**Table S1 Effect of initiator dosage on particle size and monodispersity of colloidal PMMA nanospheres**

| Sample number | KPS (wt%) | Dm(nm) | PDI                 | pH |
|---------------|-----------|--------|---------------------|----|
| 1             | 0.11      |        | Incomplete reaction |    |
| 2             | 0.17      | 379.6  | 0.047               | 7  |
| 3             | 0.22      | 367.5  | 0.031               | 6  |
| 5             | 0.33      | 385.3  | 0.084               | 6  |
| 7             | 0.44      | 363.3  | 0.028               | 6  |
| 8             | 0.50      | 503.0  | 0.227               | 4  |
| 9             | 0.56      | 481.6  | 0.310               | 3  |

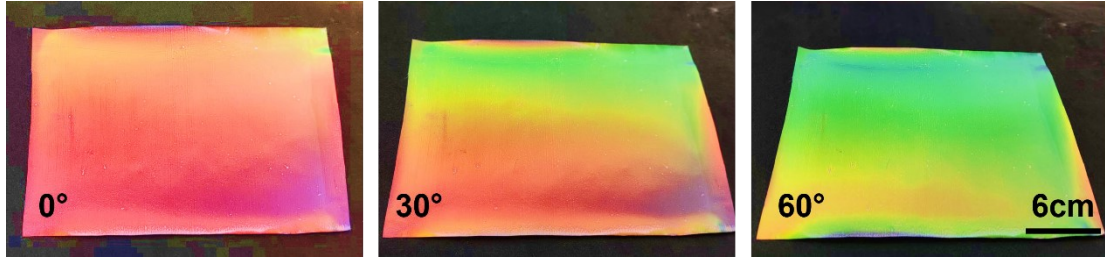

Figure S2 Angle-dependent structural colors of PMMA photonic crystals on fabric substrate.

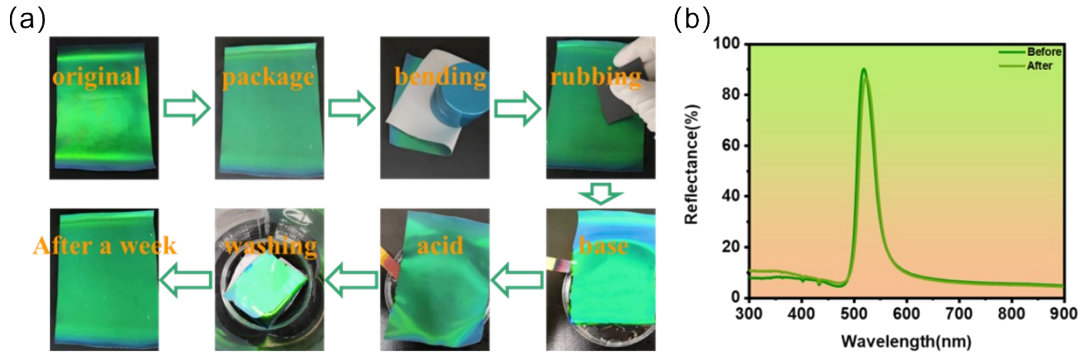

Figure S3 (a) Fastness test of structurally colored fabric with PMMA photonic crystals; (b) Reflectance curves before and after the test.

Testing conditions for washing fastness: sample size 40 mm x 100 mm; test solution containing 5 g/L of soap flakes and 2 g/L of anhydrous sodium carbonate; washing at 40 °C for 30 min.

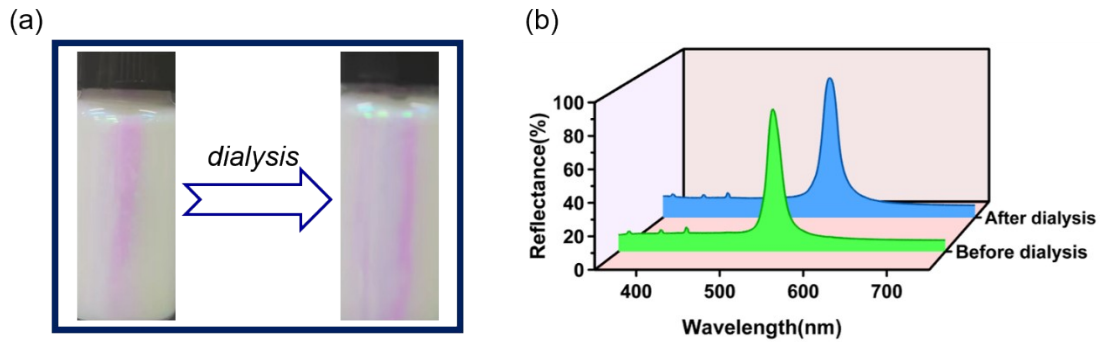

Figure S4 (a) PMMA liquid photonic crystals before and after dialysis; (b) Corresponding reflectance spectra.
